# Supplementary material for: Validating an Instrument for Direct Patient Reporting of Distress and Chemotherapy-Related Toxicity among South African Cancer Patients
Source: MDPI journal article supplement (doi:10.3390/cancers14010095), 2021-12-24
Supplement: s1 [file s1]

**Step 1.**

Circle the number on the thermometer below how much physical and emotional suffering you have experienced since your last chemotherapy cycle (or over the last 7 days if you are not taking chemotherapy yet).

**Severe  
Suffering**

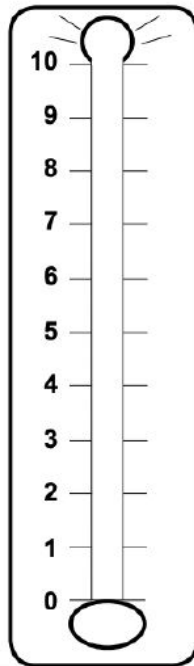

**No  
Suffering**

**Step 2.**

Circle each problem that has been contributing to your suffering.

**Transportation**

**Stress**

**Child Care / Dealing with  
Family**

**Relating to God / Relating  
to Ancestors**

**Housing /  
Accommodations**

**Loss of Hope**

**Finances / Work**

**Needing Care at Home**

**Depression / Sadness**

**Needing More Information**

**Step 3.**

Think about the physical symptoms you have had since your most recent dose of chemotherapy (or over the last 7 days if you are not taking chemotherapy yet). For each of the following symptoms, select the box that describes how severe your symptoms were for your last dose of chemotherapy.

| Symptom Severity           |                                                     |                                                                                     |                                                                                                |                                                                                           |                                                                             |
|----------------------------|-----------------------------------------------------|-------------------------------------------------------------------------------------|------------------------------------------------------------------------------------------------|-------------------------------------------------------------------------------------------|-----------------------------------------------------------------------------|
|                            | 0                                                   | 1                                                                                   | 2                                                                                              | 3                                                                                         | 4                                                                           |
| <b>Pain</b>                | <input type="checkbox"/><br>No pain at all          | <input type="checkbox"/><br>A little pain but not interfering with daily activities | <input type="checkbox"/><br>Moderate pain that interferes with my daily activities a little    | <input type="checkbox"/><br>Severe pain that interferes with my daily activities a lot    | <input type="checkbox"/><br>Completely disabling pain                       |
| <b>Fatigue (Tiredness)</b> | <input type="checkbox"/><br>No extra fatigue at all | <input type="checkbox"/><br>Mild fatigue but not interfering with daily activities  | <input type="checkbox"/><br>Moderate fatigue that interferes with my daily activities a little | <input type="checkbox"/><br>Severe fatigue that interferes with my daily activities a lot | <input type="checkbox"/><br>So tired I can barely get out of bed or a chair |

**Turn Over →**

**Figure S1.** Front page of the Patient Reported Symptoms – South Africa instrument.

Study ID: \_\_\_\_\_ Visit #: \_\_\_\_\_

|                                                          |                                                                            |                                                                                                        |                                                                                                         |                                                                                                              |                                                                                      |
|----------------------------------------------------------|----------------------------------------------------------------------------|--------------------------------------------------------------------------------------------------------|---------------------------------------------------------------------------------------------------------|--------------------------------------------------------------------------------------------------------------|--------------------------------------------------------------------------------------|
| <b>Fever</b>                                             | <input type="checkbox"/><br>No fever at all                                | <input type="checkbox"/><br>Fever one time that went away on its own                                   |                                                                                                         | <input type="checkbox"/><br>Repeated fever and had to take antibiotics                                       | <input type="checkbox"/><br>Fever requiring hospitalization                          |
| <b>Difficulty Breathing (Shortness of Breath)</b>        | <input type="checkbox"/><br>No difficulty breathing at all                 | <input type="checkbox"/><br>Difficulty breathing with heavy work                                       | <input type="checkbox"/><br>Difficulty breathing with light work                                        | <input type="checkbox"/><br>Difficulty breathing with daily activities like dressing or bathing              | <input type="checkbox"/><br>Difficulty breathing when resting in bed or a chair      |
| <b>Cough</b>                                             | <input type="checkbox"/><br>No cough at all                                | <input type="checkbox"/><br>Mild cough, improved with simple medicines                                 | <input type="checkbox"/><br>Moderate cough that interferes with my daily activities a little            | <input type="checkbox"/><br>Severe cough that interferes with my daily activities or sleep a lot             |                                                                                      |
| <b>Mouth Sores or Dry Mouth</b>                          | <input type="checkbox"/><br>No mouth symptoms                              | <input type="checkbox"/><br>Mild mouth sores / dryness, no medications needed                          | <input type="checkbox"/><br>Moderate mouth sores / dryness, using medications but eating normally       | <input type="checkbox"/><br>Severe mouth sores / dryness, cannot eat normally                                | <input type="checkbox"/><br>Mouth sores / dryness requiring hospitalization          |
| <b>Nausea/Loss of Appetite</b>                           | <input type="checkbox"/><br>No nausea or loss of appetite at all           | <input type="checkbox"/><br>Nausea or less appetite but eating normally                                | <input type="checkbox"/><br>Nausea or less appetite and not eating or drinking enough                   |                                                                                                              | <input type="checkbox"/><br>Eating so little that I needed a drip or hospitalization |
| <b>Vomiting</b>                                          | <input type="checkbox"/><br>No vomiting at all                             | <input type="checkbox"/><br>Vomiting, but only 1 time each day                                         | <input type="checkbox"/><br>Vomiting, 2 to 5 times in a day                                             | <input type="checkbox"/><br>Vomiting more than 5 times in a day                                              | <input type="checkbox"/><br>Vomiting so much that I needed a drip or hospitalization |
| <b>Diarrhoea</b>                                         | <input type="checkbox"/><br>No extra bowel movements (number 2)            | <input type="checkbox"/><br>1 to 3 extra bowel movements (number 2) in a day                           | <input type="checkbox"/><br>4 - 6 extra bowel movements (number 2) in a day                             | <input type="checkbox"/><br>More than 6 extra bowel movements (number 2) in a day                            | <input type="checkbox"/><br>Diarrhea requiring hospitalization                       |
| <b>Constipation</b>                                      | <input type="checkbox"/><br>No constipation at all                         | <input type="checkbox"/><br>Sometimes constipation                                                     | <input type="checkbox"/><br>I cannot have a bowel movement (number 2) without medications               | <input type="checkbox"/><br>Constipation that interferes with my daily activities a lot                      | <input type="checkbox"/><br>Constipation requiring hospitalization                   |
| <b>Burning or "Pins &amp; Needles" in Hands and Feet</b> | <input type="checkbox"/><br>No burning / "pins & needles" in hands or feet | <input type="checkbox"/><br>Mild burning / "pins & needles", but not interfering with daily activities | <input type="checkbox"/><br>Moderate burning / "pins" that interferes with my daily activities a little | <input type="checkbox"/><br>Severe burning / "pins & needles" that interferes with my daily activities a lot |                                                                                      |

Turn Over →

Figure S2. Back page of the Patient Reported Symptoms – South Africa instrument.

**Table S1.** Pearson Correlations Between PRS-SA Symptom Item Severity and QLQ-C30 Functional Scale Scores.

|                       | QLQ-C30 Functional Scales |         |            |         |                |         |                |         |             |         |
|-----------------------|---------------------------|---------|------------|---------|----------------|---------|----------------|---------|-------------|---------|
|                       | Physical (PF2)            |         | Role (RF2) |         | Emotional (EF) |         | Cognitive (CF) |         | Social (SF) |         |
| PRS-SA Symptom        | r                         | p-value | r          | p-value | r              | p-value | r              | p-value | r           | p-value |
| Pain                  | 0.38                      | <0.0001 | 0.33       | <0.0001 | 0.35           | <0.0001 | 0.28           | <0.0001 | 0.26        | <0.0001 |
| Fatigue               | 0.57                      | <0.0001 | 0.46       | <0.0001 | 0.51           | <0.0001 | 0.43           | <0.0001 | 0.45        | <0.0001 |
| Fever                 | 0.23                      | <0.0001 | 0.13       | <0.0001 | 0.18           | <0.0001 | 0.24           | <0.0001 | 0.09        | 0.04    |
| Dyspnea               | 0.45                      | <0.0001 | 0.34       | <0.0001 | 0.29           | <0.0001 | 0.27           | <0.0001 | 0.26        | <0.0001 |
| Cough                 | 0.22                      | <0.0001 | 0.21       | <0.0001 | 0.18           | <0.0001 | 0.16           | <0.0001 | 0.13        | <0.0001 |
| Oral Mucositis        | 0.29                      | <0.0001 | 0.25       | <0.0001 | 0.31           | <0.0001 | 0.22           | <0.0001 | 0.25        | <0.0001 |
| Nausea                | 0.41                      | <0.0001 | 0.39       | <0.0001 | 0.39           | <0.0001 | 0.31           | <0.0001 | 0.38        | <0.0001 |
| Vomiting              | 0.30                      | <0.0001 | 0.24       | <0.0001 | 0.22           | <0.0001 | 0.18           | <0.0001 | 0.24        | <0.0001 |
| Diarrhea              | 0.06                      | 0.19    | 0.08       | 0.06    | 0.11           | 0.01    | 0.08           | 0.06    | 0.13        | 0.002   |
| Constipation          | 0.30                      | <0.0001 | 0.22       | <0.0001 | 0.28           | <0.0001 | 0.28           | <0.0001 | 0.22        | <0.0001 |
| Peripheral Neuropathy | 0.35                      | <0.0001 | 0.26       | <0.0001 | 0.42           | <0.0001 | 0.42           | <0.0001 | 0.29        | <0.0001 |
